# Supplementary material
Source: PubMed Central journal article supplement (PMC4034693)

Supplementary Figure S2. Gating strategy for FACS analysis of mammary epithelial subpopulations

A. Sample

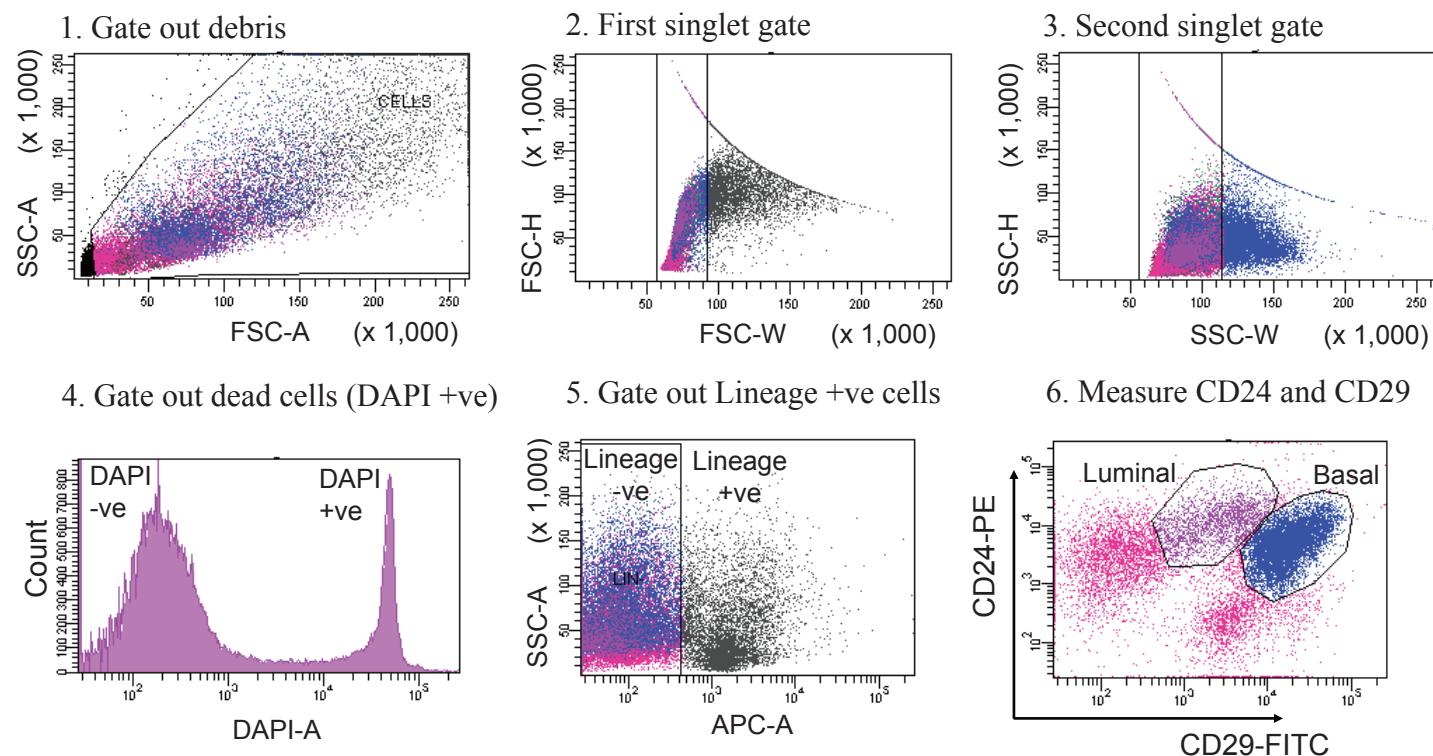

B. Isotype controls

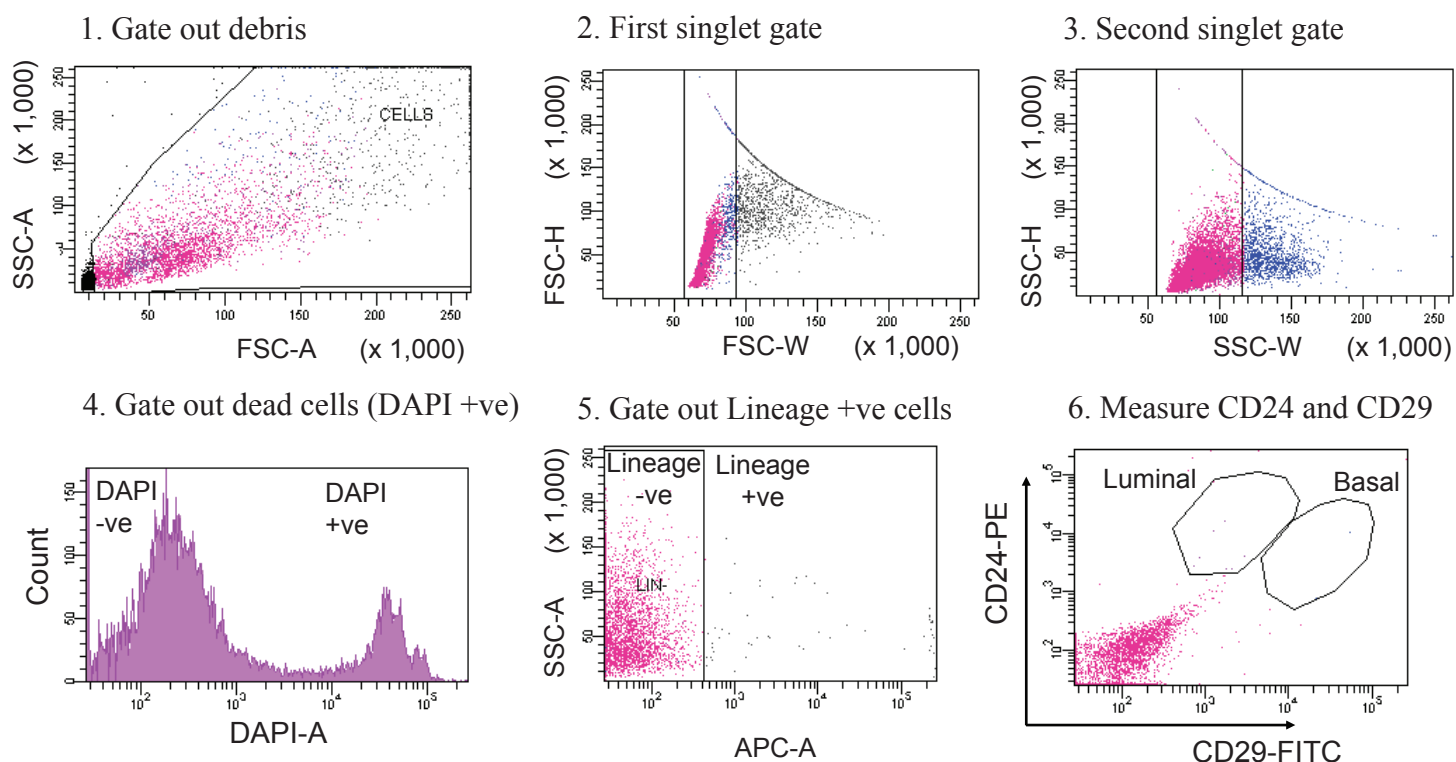

Supplement: NIHMS575389-supplement-Fig__S2.pdf [file NIHMS575389-supplement-Fig__S2.pdf]
