# Supplementary material
Source: PubMed Central journal article supplement (PMC4034693)
Supplement: NIHMS575389-supplement-Table_S1.pdf [file NIHMS575389-supplement-Table_S1.pdf]

**Supplementary Table S1.** List of antibodies

| <b>Antibody</b>                                             | <b>Vendor</b>  | <b>Catalog Number</b> |
|-------------------------------------------------------------|----------------|-----------------------|
| PE Rat Anti-Mouse CD24                                      | BD Biosciences | 553262                |
| PE Rat IgG2b, $\kappa$ Isotype Control                      | BD Biosciences | 553989                |
| FITC anti-mouse / rat CD29                                  | BioLegend      | 102206                |
| FITC Armenian Hamster IgG Isotype Ctrl                      | BioLegend      | 400906                |
| APC-Cy <sup>TM</sup> 7 Mouse Anti-Rat CD90/Mouse CD90.1     | BD Biosciences | 561401                |
| APC-Cy <sup>TM</sup> 7 Mouse IgG1, $\kappa$ Isotype Control | BD Biosciences | 557873                |
| Biotin Mouse Lineage Panel                                  | BD Biosciences | 559971                |
| Biotin Rat Anti-Mouse CD31                                  | BD Biosciences | 553371                |
| APC Streptavidin                                            | BD Biosciences | 554067                |
