# Supplementary material
Source: PubMed Central journal article supplement (PMC4034693)
Supplement: NIHMS575389-supplement-Table_S3.pdf [file NIHMS575389-supplement-Table_S3.pdf]

**Supplementary Table S3.** Mouse primer sequences used for real-time RT-PCR

| <b>Gene</b>  | <b>Sense</b>                      | <b>Antisense</b>                 | <b>Product size<br/>(bp)</b> |
|--------------|-----------------------------------|----------------------------------|------------------------------|
| <i>18s</i>   | 5'-TGC TCT TAG CTG AGT GTC CCG-3' | 5'-TCA TGG CCT CAG TTC CGA AA-3' | 153                          |
| <i>Ccl8</i>  | 5'-AGGGATTGAGAGGACGCTAG-3'        | 5'-GGTGACTGGAGCCTTATCTG-3'       | 141                          |
| <i>Il6</i>   | 5'-CAAAGCCAGAGTCCTTCAGAG-3'       | 5'-GTCCTTAGCCACTCCTTCTG-3'       | 150                          |
| <i>Stat1</i> | 5'-GCCGAGAACATACCAGAGAATC-3'      | 5'-GATGTATCCAGTTCGCTTAGGG-3'     | 141                          |
| <i>Tbp</i>   | 5'-ACTTGACCTAAAGACCATTGCACTT-3'   | 5'-TCTTCCTAACACGCTGGTCAAA-3'     | 101                          |
| <i>Tnc</i>   | 5'-ATAGCCAACATCACAGACTCAG-3'      | 5'-GCTCGTACTCCACTGTATTTCC-3'     | 142                          |
| <i>Wnt1</i>  | 5'-TCTTCGGCAAGATCGTCAACCGA-3'     | 5'-AAATCGATGTTGTCACTGCAGCCC-3'   | 193                          |
