# Supplementary material
Source: PubMed Central journal article supplement (PMC4034693)
Supplement: NIHMS575389-supplement-Table_S4.pdf [file NIHMS575389-supplement-Table_S4.pdf]

**Supplementary Table S4.** List of upregulated genes in the MaSC-enriched population from SPI-fed PND75 Wnt1-Tg mice, relative to CAS-fed counterparts ( $\geq 1.3$ -fold change cutoff)

| <i>Upregulated in SPI</i> |         |              |           |         |          |           |         |
|---------------------------|---------|--------------|-----------|---------|----------|-----------|---------|
| Abhd10                    | Cdan1   | Fam3c        | Hist1h3i  | Lmnb1   | Padi3    | Sag       | Trp63   |
| Accn1                     | Cenpa   | Fam49b       | Hist2h3c1 | Lnx2    | Pappa    | Sema3c    | Tsc22d3 |
| Acly                      | Cfp     | Fam65b       | Hist1h3h  | Mir1949 | Parm1    | Sema4c    | Ttc26   |
| Acot6                     | Chac1   | Fam82a1      | Hist1h3g  | Luc7l2  | Pcp4     | Sema6d    | Tubgcp5 |
| Adamts9                   | Chrm3   | Fen1         | Hist2h3b  | Lrrc4   | Pde4dip  | Serpinb6b | Twist1  |
| Adcy9                     | Cldn8   | Fgfr2        | Hist1h3f  | Lrrc4c  | Pdk4     | Serpinb9  | Ugt1a1  |
| Adipoq                    | Cml1    | Fhod3        | Hist1h3e  | Lrrc8c  | Per1     | Serpine1  | Ugt1a2  |
| Adm                       | Cml5    | Flnc         | Hist1h3d  | Maob    | Per2     | Sipa1l2   | Ugt1a5  |
| Adra2a                    | Cobll1  | Fosb         | Hist1h3c  | Map2k6  | Pfas     | Slc14a1   | Ugt1a6a |
| Aff2                      | Cpa6    | Gal          | Hist1h3b  | Map3k5  | Pgm5     | Slc15a2   | Ugt1a6b |
| Ak1                       | Cpt1a   | Galntl4      | Hist1h4c  | Matn2   | Pik3r4   | Slc2a13   | Ugt1a7c |
| Akap11                    | Crybb1  | Gas2l3       | Hist1h4h  | Mkx     | Plcb1    | Slc7a5    | Ugt1a9/ |
| Ang                       | Ctnnal1 | Gfra1        | Hist1h4i  | Mlf1    | Plcb4    | Smarcal1  | Ugt1a10 |
| Angptl4                   | Ctnnb2  | Ggnbp1       | Hist1h4j  | Mmd     | Plin4    | Snord89   | Vcan    |
| Ankrd56                   | Cxcr4   | Glp1r        | Hist1h4k  | Mmp12   | Plk3     | Spinlw1   | Vwce    |
| Ap1s3                     | Cyp24a1 | Glrb         | Hist1h4m  | Ms4a6b  | Ppp1r14d | Spock1    | Was     |
| Aqp9                      | Cyp2c37 | Gnai1        | Hist1h4a  | Mtap1b  | Prdm1    | Spock2    | Wisp1   |
| Arsj                      | Dctd    | Gpr50        | Hist1h4b  | Mtap7d2 | Prickle2 | Spr2a1    | Wnk2    |
| Art4                      | Dennd2c | Gprin3       | Hmgcll1   | Mthfd2  | Prkd1    | Spr2a2    | Zbtb16  |
| Atic                      | Dgat2   | Grik4        | Hsd12     | Mtmr7   | Prr51    | Spr2a3    | Zdbf2   |
| Bat1a                     | Dido1   | Gsta3        | Hspe1     | Myst1   | Psat1    | Sspn      | Zfc3h1  |
| Bear3                     | Diras2  | Gtf3c3       | Hyal1     | Nap1l2  | Psd2     | Stk17b    | Zfp12   |
| Bcat1                     | Dnahc17 | Gtsf1l       | Il17rb    | Nap1l5  | Psph     | Tbc1d1    | Zfp395  |
| Bcl6                      | Dnase1  | H2-Q5        | Il20      | Nat6    | Ptpre    | Tg        | Zfp655  |
| Bdnf                      | Ear1    | Hadha        | Il24      | Nceh1   | Ptx3     | Tgfbr3    | Zfp770  |
| Bmp8a                     | Ear2    | Hadhb        | Ints2     | Ncf4    | Pxk      | Them5     | Zfp874a |
| Bmpr1b                    | Ear3    | Hal          | Itga8     | Ndrp2   | Pygb     | Thrsp     | Zmat4   |
| Bnc1                      | Ear12   | Hao1         | Kbtbd7    | Ndufaf1 | Qsox2    | Tiam2     | Zmym6   |
| C1qc                      | Efhb    | Hcn3         | Kcnmb2    | Nfatc2  | Rab39b   | Tigd2     | Zscan18 |
| C2cd4b                    | Egfl6   | Hhip         | Kidins220 | Nhs1l   | Ras11b   | Tmem14a   | Zswim7  |
| Capn3                     | Egr4    | Hist1h1e     | Klf11     | Nme6    | Ren1     | Tmem229b  | Zwint   |
| Casq2                     | Eid3    | Hist1h2bc    | Klk1b16   | Nrg1    | Ren2     | Tmem39a   |         |
| Cbln1                     | Emb     | Hist1h2be    | Krt15     | Ntrk3   | Ret      | Tmem88b   |         |
| Ccdc62                    | Enc1    | Hist1h2bp    | Krt73     | Nudt5   | Rgs12    | Tmtc1     |         |
| Ccnf                      | Entpd5  | Hist1h2bm    | Krtap22-2 | Obox1   | Rnd3     | Top1mt    |         |
| Ccno                      | Ets1    | Hist1h2bl    | Lancl3    | Obox2   | Rorc     | Tppp      |         |
| Cer1l                     | Fam13a  | Hist1h3a     | Lgals4    | Orc1    | Rrm2     | Trim32    |         |
| Cd5l                      | Fam13c  | Hist2h3c2-ps | Lgals7    | Oxtr    | Rtn1     | Trp53inp1 |         |
