# Supplementary material
Source: PubMed Central journal article supplement (PMC4034693)
Supplement: NIHMS575389-supplement-Table_S5.pdf [file NIHMS575389-supplement-Table_S5.pdf]

**Supplementary Table S5.** List of downregulated genes in the MaSC-enriched population from SPI-fed PND75 Wnt1-Tg mice, relative to CAS-fed counterparts  $\geq 1.3$ -fold change cutoff)

| <i>Downregulated in SPI</i> |           |         |          |           |         |            |           |          |          |          |           |           |           |           |            |         |
|-----------------------------|-----------|---------|----------|-----------|---------|------------|-----------|----------|----------|----------|-----------|-----------|-----------|-----------|------------|---------|
| Aass                        | Avpi1     | Ccl21b  | Cmpk1    | Dct       | Esr1    | Gimap6     | Homer2    | Isg15    | Lox14    | Mustn1   | Pde7b     | Rab25     | Serpina1d | Sprr1a    | Tnc        | Zfp874b |
| Abca8a                      | B2m       | Ccl21c  | Cnfn     | Ddr2      | Esrp2   | Gipc1      | Hopx      | Islr     | Lpar1    | Mxd1     | Pdgfra    | Ralbp1    | Serpina1e | Srgn      | Tnf        | Zfp97   |
| Abcc9                       | Barx2     | Ccl3    | Col1a1   | Ddx60     | Esrpg   | Gjb2       | Hpse      | Itgb6    | Lpl      | Mxra8    | Pdgfrb    | Ramp2     | Serpina3g | Srpx2     | Tnfaip2    |         |
| Abcg1                       | Basp1     | Ccl5    | Col1a2   | Dhcr7     | Esyt3   | Gjb6       | Hsd11b1   | Itgb11   | Lrrc26   | Naalad2  | Pdzk1ip1  | Rarres2   | Serpina1a | Ssfa2     | Tnfaip3    |         |
| Abi3bp                      | Bbox1     | Ccl8    | Col3a1   | Dhx32     | Ezh2    | Gjc1       | Htra3     | Itih5    | Lrrfip1  | Naalad12 | Pea15a    | Rbp7      | Serpina1f | St8sia6   | Tnfaip6    |         |
| Acs11                       | Bcam      | Ccnd1   | Col5a2   | Dmkn      | Fabp4   | Gltf       | Htra3     | Itih5    | Lrrfip1  | Naalad12 | Pea15a    | Rbp7      | Serpina1f | St8sia6   | Tnfaip6    |         |
| Adamts12                    | Bckdhh    | Cd274   | Col5a3   | Dpp4      | Fam108c | Glycam1    | Idi1      | Jup      | Ltf      | Nfkbia   | Pi16      | Rgs5      | Sfrp2     | Stap2     | Trim2      |         |
| Adamts4                     | Bcl2115   | Cd34    | Col6a1   | Dpt       | Fam46b  | Csprs      | Ifi203    | Kcne4    | Lum      | Nid1     | Pid1      | Rhov      | Sh2d4a    | Stard4    | Trim30a    |         |
| Adamts5                     | Bcl3      | Cd59a   | Col6a2   | Dsc2      | Fam59a  | Gna14      | Ifi2712a  | Kcnn4    | Ly6a     | Nipal1   | Pigr      | Rnase1    | Sh3kbp1   | Stat1     | Trim30d    |         |
| Adamts7                     | Bdh1      | Cd82    | Col6a3   | Dsg1a     | Fap     | Gnb4       | Ifi35     | Kcnq1    | Ly6d     | Nipal2   | Pik3ap1   | Rnf125    | Sh3yl1    | Steap3    | Trim68     |         |
| Adcy7                       | Bend7     | Cdh11   | Colec12  | Dtx3l     | Fbln5   | Gprc5a     | Ifi47     | Kctd14   | Ly96     | Nkd2     | Pkp2      | Rnf152    | Shc4      | Stra6     | Trpm4      |         |
| Add3                        | Bex1      | Cdh5    | Cpa3     | Duox1     | Fbp1    | Gramd4     | Ifih1     | Kif26a   | Lypd3    | Notch2   | Pla1a     | Rsad2     | Shisa4    | Sulf2     | Trpv6      |         |
| Adh1                        | Bglap     | Cdkn2b  | Cpxm1    | Duoxa1    | Fbxo6   | Grasp      | Ifit1     | Kit      | Lypd6b   | Notch3   | Pla2g16   | Rtp4      | Sigirr    | Sult1a1   | Tspan33    |         |
| Afap112                     | Bglap2    | Cdo1    | Crabp1   | Ebf1      | Fcer1a  | Gsn        | Ifit2     | Klk11    | Mal      | Npas2    | Plcg2     | Runx3     | Slc1a1    | Susd2     | Tspo       |         |
| Akr1c14                     | Bglap-rs1 | Ceacam1 | Crabp2   | Ecscr     | Fcgr2b  | Gsta4      | Ifit3     | Krt18    | Mal2     | Nr2f1    | Plekha7   | S100a14   | Slc28a3   | Svep1     | Tubb2a-ps2 |         |
| Aldh1a1                     | Bicc1     | Ceacam2 | Crip1    | Ednrb     | Fdft1   | Gstt1      | Igf1      | Krt19    | Mall     | Nrn1     | Plekha7   | S100a4    | Slc40a1   | Syng2     | Tubb2b     |         |
| Aldh1a3                     | Birc5     | Cel     | Crispld1 | Efcab4a   | Fgf14   | Gstt2      | Igf1      | Krt4     | Map3k1   | Nrp1     | Plscr1    | S100a6    | Slc41a2   | Tacstd2   | Tuft1      |         |
| Aldh3a1                     | Blnk      | Cerk    | Cryba4   | Efemp1    | Fgf14   | Gulp1      | Igf1      | Krt6a    | Mapk13   | Ntn1     | Plscr2    | S1pr3     | Slc43a2   | Tagln2    | Ugcg       |         |
| Alox15                      | Bmper     | Cfh     | Csf3     | Egflam    | Fgl2    | Gvin1      | Igh-3     | Krt6b    | Marveld2 | Nts      | Plvap     | Saa1      | Slc44a3   | Tap1      | Usp18      |         |
| Angpt2                      | Bnipl     | Chad    | Csn1s1   | Ehf       | Figf    | H2-D1      | Igh-6     | Krt7     | Marveld3 | Nupr1    | Pmm1      | Saa2      | Slc5a1    | Tgtp1     | Vat1       |         |
| Anxa1                       | Bspry     | Chchd10 | Csn1s2a  | Eif2ak2   | Flrt2   | H2-K1      | Igh-VJ558 | Krt79    | Mcc      | Oas1a    | Pnpla2    | Saa3      | Slc5a9    | Tgtp2     | Vcam1      |         |
| Anxa2                       | Bst1      | Chi311  | Csrp2    | Eif2ak3   | Fmn1    | H2-L       | Ighg      | Krt80    | Mcpt4    | Oasl1    | Pof1b     | Samhd1    | Slc9a3r1  | Thbd      | Vtn        |         |
| Anxa3                       | Bst2      | Chl1    | Cthrc1   | Eif4e3    | Fmod    | H2-Q2      | Ighg1     | L1cam    | Meox2    | Oasl2    | Postn     | Sbsn      | Slnf8     | Thbs2     | Vwf        |         |
| Anxa8                       | C1qtnf2   | Chst1   | Ctsh     | Elf3      | Fn1     | H2-Q6      | Igj       | Lad1     | Mfap4    | Obfc1    | Ppp1r9a   | Scara3    | Slit2     | Thy1      | Wap        |         |
| Aoc3                        | C1ra      | Chst12  | Ctsk     | Elov17    | Foxc1   | H2-Q7      | Igtj      | Lama2    | Mfap5    | Ocln     | Prkch     | Scara5    | Slit3     | Tie1      | Wbscr27    |         |
| Aplnr                       | C1rb      | Cilp    | Cwh43    | Emilin2   | Frg1    | H2-T3      | Iigp1     | Lass3    | Mfsd6    | Ogn      | Prlr      | Scarb1    | Slk       | Timp3     | Wfdc2      |         |
| Apoc1                       | C1s       | Ckmt1   | Cxcl10   | Emp2      | Frk     | H2-T3-like | I118      | Ldb2     | Mgam     | Olrl     | Prrt2     | Scd1      | Smagp     | Tlr4      | Wnt5b      |         |
| Apol7a                      | C2        | Clca1   | Cxcl11   | Emp3      | Fscn1   | H2-T9      | I118r1    | Lgals1   | Mical2   | Ormdl2   | Prss8     | Scd2      | Smoc2     | Tmc4      | Wwc1       |         |
| Apol7c                      | Cfb       | Clca2   | Cxcl13   | Enah      | Fut9    | H2-T10     | I11a      | Lgals3   | Mmp13    | Osblp3   | Psap11    | Scel      | Sorbs2    | Tmem140   | Xaf1       |         |
| Apold1                      | Calcr1    | Clcn3   | Cxcl5    | Endod1    | Fxyd3   | H2-T18     | I11r1     | Lgals3bp | Mmp19    | P4ha2    | Psmb8     | Scnn1a    | Sox17     | Tmem176a  | Zbp1       |         |
| Aqp1                        | Calml3    | Cldn10  | Cxcl9    | Enpep     | Fxyd6   | H2-T22     | I11rn     | Lif      | Mmp3     | Pamr1    | Pstpip2   | Sele      | Sox7      | Tmem30b   | Zbtb7c     |         |
| Arap2                       | Cap1      | Cldn7   | Cyb561   | Enpp2     | Gabrp   | H2-T23     | I16       | Lin7a    | Mmrn2    | Parp14   | Ptplad2   | Selp      | Sparcl1   | Tmem87a   | Zeb1       |         |
| Arg1                        | Car2      | Clec11a | Cygb     | Enpp3     | Gbp10   | Has1       | Inhbb     | Lipg     | Mnda     | Parp9    | Ptprb     | Sept4     | Spats21   | Tmod3     | Zeb2       |         |
| Aspa                        | Card11    | Clec3b  | Cyp1b1   | Epb4.114a | Gbp2    | Hc         | Inmt      | Lmo2     | Mppd2    | Pbxip1   | Ptprz1    | Sept5     | Spink5    | Tmprss11a | Zfxh3      |         |
| Aspn                        | Ccdc80    | Clic3   | Cyp4f39  | Epha3     | Gbp3    | Herc6      | Irf2      | Lmo7     | Mras     | Pcdh1    | Pvrl4     | Serpina10 | Spint1    | Tmprss11d | Zfp458     |         |
| Asprv1                      | Ccl11     | Clip4   | Cytip    | Eppk1     | Gbp6    | Hes1       | Irf9      | Lox      | Mrc2     | Pcdh17   | Pygl      | Serpina1a | Spns2     | Tmprss11e | Zfp472     |         |
| Atp10a                      | Ccl19     | Clu     | Cyyr1    | Epyc      | Gdf10   | Hexa       | Irgm1     | Lox11    | Ms4a4d   | Pcolce   | Qpct      | Serpina1b | Spon1     | Tmprss13  | Zfp600     |         |
| Atp1b1                      | Ccl21a    | Cma1    | Daf2     | Erb3      | Gdpd1   | Homer1     | Irgm2     | Lox12    | Mtm1     | Pde1c    | Rab11fip1 | Serpina1c | Spp1      | Tmprss4   | Zfp605     |         |
