# Supplementary material
Source: PubMed Central journal article supplement (PMC4034693)
Supplement: NIHMS575389-supplement-Table_S7.pdf [file NIHMS575389-supplement-Table_S7.pdf]

**Supplementary Table S7.** Top biological functions of differentially expressed genes by SPI in MaSC-enriched population identified through IPA (Total of 907 genes)\*

| <b>Biological Functions</b>                          | <b>P-value</b>      | <b>No. of Molecules</b> |
|------------------------------------------------------|---------------------|-------------------------|
| <u>Diseases and disorders</u>                        |                     |                         |
| Cancer                                               | 5.34E-33 - 1.31E-04 | 398                     |
| Reproductive system disease                          | 1.32E-24 - 1.01E-04 | 243                     |
| Dermatological diseases and conditions               | 1.64E-23 - 1.52E-04 | 157                     |
| Genetic disorder                                     | 1.64E-23 - 2.72E-05 | 248                     |
| Inflammatory response                                | 6.34E-18 - 1.56E-04 | 196                     |
| <u>Molecular and cellular functions</u>              |                     |                         |
| Cellular movement                                    | 1.16E-26 - 1.45E-04 | 228                     |
| Cell-to-cell signaling and interaction               | 5.00E-14 - 1.39E-04 | 170                     |
| Cellular growth and proliferation                    | 8.40E-11 - 1.64E-04 | 300                     |
| Cell morphology                                      | 7.72E-10 - 1.64E-04 | 193                     |
| Lipid metabolism                                     | 1.41E-09 - 1.53E-04 | 125                     |
| <u>Physiological system development and function</u> |                     |                         |
| Immune cell trafficking                              | 6.05E-16 - 1.47E-04 | 143                     |
| Cardiovascular system development and function       | 1.02E-15 - 1.64E-04 | 127                     |
| Organismal development                               | 5.27E-15 - 1.55E-04 | 209                     |
| Hematological system development and function        | 1.53E-14 - 1.56E-04 | 207                     |
| Tissue development                                   | 2.88E-10 - 1.64E-04 | 275                     |

\* SPI-regulated genes (SPI vs. CAS);  $\geq 1.3$  fold-change
