# Supplementary material
Source: PubMed Central journal article supplement (PMC4034693)
Supplement: NIHMS575389-supplement-Table_S8.pdf [file NIHMS575389-supplement-Table_S8.pdf]

**Supplementary Table S8.** Top 50 canonical pathways identified using IPA in MaSC-enriched population from CAS and SPI-fed Wnt1-Tg mice (Total of 907 genes)

| <b>Ingenuity Canonical Pathway</b>                     | <b>-log (P-value)</b> | <b>P-value</b> | <b>Ratio</b> | <b>Molecules</b>                                                                                                                                                                    |
|--------------------------------------------------------|-----------------------|----------------|--------------|-------------------------------------------------------------------------------------------------------------------------------------------------------------------------------------|
| Atherosclerosis Signaling                              | 6.51E+00              | 3.09E-07       | 1.71E-01     | ALOX15,VCAM1,SELE (includes EG:20339),IL1A,MMP3,CXCR4,CMA1,CLU,MM P13,IL6,CCL11,COL1A2,APOC1,COL1A1,COL5 A3,IL18 (includes EG:16173),SELP,IL1RN,LPL,SERPINA1,TNF,CO L3A1            |
| Acute Phase Response Signaling                         | 6.13E+00              | 7.41E-07       | 1.53E-01     | MAP2K6,IL1A,SERPING1,FN1,SAA2,MAP3K5, MAPK13,IL6,C1R,NFKBIA,MRAS,SERPINA1,SE RPINE1,SAA1,C1S,MAP3K1,SERPINF1,VWF,C5 ,IL1R1,CRABP1,IL18 (includes EG:16173),RBP7,IL1RN,CRABP2,TNF,C2 |
| Hepatic Fibrosis / Hepatic Stellate Cell Activation    | 5.01E+00              | 9.77E-06       | 1.50E-01     | VCAM1,IL1A,FN1,CXCL9,EDNRB,FGFR2,MMP 13,IL6,CCL5,IL1R1,COL1A2,COL1A1,TLR4,LY9 6 (includes EG:17087),IGF1,PDGFRA,CCL21,FIGF,STAT1,T NF,COL3A1,PDGFRB                                 |
| LXR/RXR Activation                                     | 4.62E+00              | 2.40E-05       | 1.40E-01     | SCD,IL1A,VTN,SERPINF1,CLU,SAA2,ABCG1,IL 6,IL1R1,APOC1,FDFT1,TLR4,LY96 (includes EG:17087),IL18 (includes EG:16173),IL1RN,LPL,SERPINA1,SAA1,TNF                                      |
| Communication between Innate and Adaptive Immune Cells | 3.98E+00              | 1.05E-04       | 1.19E-01     | B2M,IL1A,CCL5,IL6,CXCL10,TLR4,IL18 (includes EG:16173),HLA-E,IL1RN,HLA- B,CCL3L1/CCL3L3,TNF,HLA-C                                                                                   |

|                                                                                |          |          |          |                                                                                                                                                                                                                         |
|--------------------------------------------------------------------------------|----------|----------|----------|-------------------------------------------------------------------------------------------------------------------------------------------------------------------------------------------------------------------------|
| Dendritic Cell Maturation                                                      | 3.62E+00 | 2.40E-04 | 1.03E-01 | B2M,IL1A,IL6,MAPK13,PIK3R4,FCGR2B,COL1A2,COL1A1,TLR4,IL18 (includes EG:16173),COL5A3,NFKBIA,IL1RN,FSCN1,HLA-B,STAT1,TNF,HLA-C,COL3A1                                                                                    |
| NF-κB Signaling                                                                | 3.52E+00 | 3.02E-04 | 1.20E-01 | SIGIRR,MAP2K6,IL1A,TGFBR3,FGFR2,TNFAIP3,IL1R1,PIK3R4,TLR4,IL18 (includes EG:16173),BMPR1B,NFKBIA,IL1RN,NTRK3,PLCG2,PDGFRA,MRAS,EIF2AK2,TNF,CARD11,PDGFRB                                                                |
| LPS/IL-1 Mediated Inhibition of RXR Function                                   | 3.44E+00 | 3.63E-04 | 1.02E-01 | GSTA3,IL1A,CPT1A,MAP3K1,ABCG1,CHST12,IL1R1,APOC1,GSTT2/GSTT2B,TLR4,GSTT1,MAOB,IL18 (includes EG:16173),LY96 (includes EG:17087),ALDH1A1,SCARB1,IL1RN,ALDH1A3,SULT1A1,FABP4,CYP2C19,TNF,ALDH3A1,ACSL1                    |
| Complement System                                                              | 3.34E+00 | 4.57E-04 | 2.00E-01 | C1R,SERPING1,C1S,C1QC,C5,CFH,C2                                                                                                                                                                                         |
| Role of Cytokines in Mediating Communication between Immune Cells              | 3.28E+00 | 5.25E-04 | 1.45E-01 | IL1A,IL18 (includes EG:16173),IL20,IL1RN,IL6,CSF3,IL24,TNF                                                                                                                                                              |
| Role of Macrophages, Fibroblasts and Endothelial Cells in Rheumatoid Arthritis | 3.22E+00 | 6.03E-04 | 9.28E-02 | MAP2K6,IL1A,FN1,SFRP2,MMP3,MMP13,CCL5,GNA14,IL6,PIK3R4,CCND1,IL18R1,NFKBIA,MRAS,PLCB1,FIGF,PRKD1,WNT5B,ADAMTS4,SELE (includes EG:20339),VCAM1,C5,IL1R1,TLR4,IL18 (includes EG:16173),PLCB4,IL1RN,PLCG2,NFATC2,PRKCH,TNF |
| Pathogenesis of Multiple Sclerosis                                             | 3.16E+00 | 6.92E-04 | 4.44E-01 | CXCL10,CXCL9,CCL5,CXCL11                                                                                                                                                                                                |

|                                                                              |          |          |          |                                                                                                                                                                                               |
|------------------------------------------------------------------------------|----------|----------|----------|-----------------------------------------------------------------------------------------------------------------------------------------------------------------------------------------------|
| Role of Osteoblasts, Osteoclasts and Chondrocytes in Rheumatoid Arthritis    | 3.14E+00 | 7.24E-04 | 1.05E-01 | MAP2K6,IL1A,SFRP2,MMP3,MMP13,IL6,MAP3K5,PIK3R4,IL18R1,NFKBIA,IGF1,ADAMTS5,WNT5B,BMP8A,ADAMTS4,CTSK,SPP1 (includes EG:20750),IL1R1,GSN,COL1A1,BMPR1B,IL18 (includes EG:16173),IL1RN,NFATC2,TNF |
| Role of Hypercytokinemia/hyperchemokinaemia in the Pathogenesis of Influenza | 3.12E+00 | 7.59E-04 | 1.59E-01 | CXCL10,IL1A,IL18 (includes EG:16173),IL1RN,CCL5,IL6,TNF                                                                                                                                       |
| Role of Pattern Recognition Receptors in Recognition of Bacteria and Viruses | 3.12E+00 | 7.59E-04 | 1.32E-01 | PTX3,OAS1,C1QC,C5,CCL5,IL6,PIK3R4,IFIH1,TLR4,PLCG2,PRKCH,EIF2AK2,TNF,PRKD1                                                                                                                    |
| Graft-versus-Host Disease Signaling                                          | 2.93E+00 | 1.17E-03 | 1.60E-01 | IL1A,IL18 (includes EG:16173),HLA-E,IL1RN,HLA-B,IL6,TNF,HLA-C                                                                                                                                 |
| Interferon Signaling                                                         | 2.92E+00 | 1.20E-03 | 1.94E-01 | IFIT3,OAS1,IFI35,IRF9,PSMB8,STAT1,TAP1                                                                                                                                                        |
| VDR/RXR Activation                                                           | 2.86E+00 | 1.38E-03 | 1.48E-01 | CXCL10,SERPINB1,IGFBP6,SPP1 (includes EG:20750),CYP24A1,TRPV6,MXD1,PRKCH,HES1 (includes EG:15205),CCL5,THBD,PRKD1                                                                             |
| HMGB1 Signaling                                                              | 2.73E+00 | 1.86E-03 | 1.30E-01 | MAP2K6,SELE (includes EG:20339),IL1A,VCAM1,MAPK13,IL1R1,PIK3R4,TLR4,RHOV,RND3,MRAS,SERPINE1,TNF                                                                                               |
| Activation of IRF by Cytosolic Pattern Recognition Receptors                 | 2.63E+00 | 2.34E-03 | 1.25E-01 | IFIH1,NFKBIA,ZBP1,IRF9,IL6,STAT1,IFIT2,TNF,ISG15                                                                                                                                              |
| Leukocyte Extravasation Signaling                                            | 2.52E+00 | 3.02E-03 | 1.01E-01 | CLDN10,TIMP3,VCAM1,MMP3,CXCR4,GNAI1,THY1,MMP13,MAPK13,CLDN7,NCF4,PIK3R4,CDH5,CLDN8,WAS,PLCG2,PRKCH,MMP12,PRKD1,MMP19                                                                          |
| Starch and Sucrose Metabolism                                                | 2.51E+00 | 3.09E-03 | 5.42E-02 | ENPP3,NUDT5,UGT1A6,PGM5,HPSE,PYGB,PYGL,ENPP2,MGAM                                                                                                                                             |

|                                          |          |          |          |                                                                                                                                                                         |
|------------------------------------------|----------|----------|----------|-------------------------------------------------------------------------------------------------------------------------------------------------------------------------|
| Xenobiotic Metabolism Signaling          | 2.49E+00 | 3.24E-03 | 8.50E-02 | MAP2K6,IL1A,UGT1A6,IL6,MAP3K5,MAPK13,PIK3R4,CEL,GSTT2/GSTT2B,GSTT1,MAOB,ALDH1A1,ALDH1A3,MRAS,ALDH3A1,PRKD1,GSTA3,MAP3K1,CHST12,CYP1B1,SULT1A1,PRKCH,CYP2C19,TNF,EIF2AK3 |
| Intrinsic Prothrombin Activation Pathway | 2.46E+00 | 3.47E-03 | 1.88E-01 | COL1A2,COL1A1,COL5A3,Klk1b1 (includes others),THBD,COL3A1                                                                                                               |
| Antigen Presentation Pathway             | 2.38E+00 | 4.17E-03 | 1.50E-01 | B2M,HLA-E,HLA-B,PSMB8,TAP1,HLA-C                                                                                                                                        |
| IL-10 Signaling                          | 2.30E+00 | 5.01E-03 | 1.28E-01 | MAP2K6,IL1A,IL18 (includes EG:16173),NFKBIA,IL1RN,MAPK13,IL1R1,IL6,FCGR2B,TNF                                                                                           |
| IL-1 Signaling                           | 2.27E+00 | 5.37E-03 | 1.13E-01 | MAP2K6,ADCY9,GNB4,IL1A,NFKBIA,MAP3K1,MRAS,GNAI1,MAPK13,GNA14,IL1R1,ADCY7                                                                                                |
| Arginine and Proline Metabolism          | 2.25E+00 | 5.62E-03 | 5.68E-02 | AOC3,MAOB,ALDH1A1,ALDH1A3,LOXL1,CKMT1A/CKMT1B,ALDH3A1,P4HA2,BCKDHB,ARG1                                                                                                 |
| Thyroid Cancer Signaling                 | 2.09E+00 | 8.13E-03 | 1.67E-01 | CXCL10,Klk1b1 (includes others),BDNF,NTRK3,MRAS,RET,CCND1                                                                                                               |
| Sphingosine-1-phosphate Signaling        | 2.06E+00 | 8.71E-03 | 1.06E-01 | ADCY9,GNAI1,GNA14,PIK3R4,S1PR3,RHOV,PLCB4,RND3,PLCG2,PDGFRA,PLCB1,ADCY7,PDGFRB                                                                                          |
| Renin-Angiotensin Signaling              | 2.06E+00 | 8.71E-03 | 1.03E-01 | ADCY9,MAP3K1,REN,MAPK13,CCL5,PIK3R4,PLCG2,MRAS,PRKCH,STAT1,ADCY7,TNF,PRKD1                                                                                              |
| ±-Adrenergic Signaling                   | 2.03E+00 | 9.33E-03 | 1.05E-01 | ADRA2A,ADCY9,GNB4,PLCG2,MRAS,GNAI1,PTYGB,PYGL,PRKCH,ADCY7,PRKD1                                                                                                         |
| Allograft Rejection Signaling            | 2.03E+00 | 9.33E-03 | 7.37E-02 | B2M,H2-Q5,HLA-E,HLA-B,H2-T10/H2-T22,TNF,HLA-C                                                                                                                           |

|                                                                                                       |          |          |          |                                                                                                                |
|-------------------------------------------------------------------------------------------------------|----------|----------|----------|----------------------------------------------------------------------------------------------------------------|
| Differential Regulation of Cytokine Production in Macrophages and T Helper Cells by IL-17A and IL-17F | 2.01E+00 | 9.77E-03 | 2.22E-01 | CCL5,IL6,CSF3,TNF                                                                                              |
| Cholecystokinin/Gastrin-mediated Signaling                                                            | 1.94E+00 | 1.15E-02 | 1.13E-01 | MAP2K6,RHOV,PLCB4,IL1A,IL18 (includes EG:16173),RND3,IL1RN,MRAS,PLCB1,PRKCH,TNF,PRKD1                          |
| Production of Nitric Oxide and Reactive Oxygen Species in Macrophages                                 | 1.94E+00 | 1.15E-02 | 8.57E-02 | MAP3K1,CLU,MAPK13,NCF4,MAP3K5,PIK3R4,APOC1,TLR4,RHOV,NFKBIA,RND3,PPP1R14D,PLCG2,SERPINA1,PRKCH,STAT1,TNF,PRKD1 |
| IL-17A Signaling in Gastric Cells                                                                     | 1.93E+00 | 1.17E-02 | 2.00E-01 | CXCL10,MAPK13,CCL5,TNF,CXCL11                                                                                  |
| Oncostatin M Signaling                                                                                | 1.87E+00 | 1.35E-02 | 1.71E-01 | TIMP3,MMP3,MRAS,MMP13,CHI3L1,STAT1                                                                             |
| Histidine Metabolism                                                                                  | 1.86E+00 | 1.38E-02 | 6.25E-02 | AOC3,MAOB,HAL,ALDH1A1,ALDH1A3,ALDH3A1,ASPA                                                                     |
| Melatonin Signaling                                                                                   | 1.83E+00 | 1.48E-02 | 1.12E-01 | MAP2K6,PLCB4,PLCG2,GNAI1,PLCB1,RORC,PRKCH,GNA14,PRKD1                                                          |
| Role of NFAT in Cardiac Hypertrophy                                                                   | 1.82E+00 | 1.51E-02 | 8.57E-02 | MAP2K6,ADCY9,LIF,MAP3K1,GNAI1,IL6,MAPK13,GNA14,PIK3R4,GNB4,PLCB4,IGF1,PLCG2,MRAS,PLCB1,PRKCH,ADCY7,PRKD1       |
| IL-6 Signaling                                                                                        | 1.81E+00 | 1.55E-02 | 1.05E-01 | MAP2K6,IL1A,MAPK13,IL1R1,IL6,PIK3R4,COL1A1,IL18 (includes EG:16173),NFKBIA,IL1RN,MRAS,TNFAIP6,TNF              |
| Chemokine Signaling                                                                                   | 1.79E+00 | 1.62E-02 | 1.23E-01 | PLCB4,CXCR4,PLCG2,MRAS,GNAI1,PLCB1,MAPK13,CCL5,CCL11                                                           |
| IL-17 Signaling                                                                                       | 1.79E+00 | 1.62E-02 | 1.22E-01 | CXCL10,MAP2K6,MMP3,MRAS,MAPK13,IL6,PIK3R4,CCL11,CXCL11                                                         |
| Bile Acid Biosynthesis                                                                                | 1.76E+00 | 1.74E-02 | 6.67E-02 | HADHB,CEL,ALDH1A1,ALDH1A3,ADH1C,ALDH3A1,HADHA                                                                  |

|                                                                                                    |          |          |          |                                                                                                                     |
|----------------------------------------------------------------------------------------------------|----------|----------|----------|---------------------------------------------------------------------------------------------------------------------|
| Differential Regulation of Cytokine Production in Intestinal Epithelial Cells by IL-17A and IL-17F | 1.72E+00 | 1.91E-02 | 1.74E-01 | IL1A,CCL5,CSF3,TNF                                                                                                  |
| Ascorbate and Aldarate Metabolism                                                                  | 1.72E+00 | 1.91E-02 | 5.06E-02 | ALDH1A1,ALDH1A3,ALDH3A1,BCKDHB                                                                                      |
| Aryl Hydrocarbon Receptor Signaling                                                                | 1.68E+00 | 2.09E-02 | 8.81E-02 | GSTA3,IL1A,IL6,CCND1,CYP1B1,NR2F1,GSTT2/GSTT2B,GSTT1,ALDH1A1,ALDH1A3,DCT,ALDH3A1,ESR1,TNF                           |
| Toll-like Receptor Signaling                                                                       | 1.67E+00 | 2.14E-02 | 1.27E-01 | MAP2K6,TLR4,LY96 (includes EG:17087),NFKBIA,MAP3K1,MAPK13,EIF2AK2                                                   |
| Hepatic Cholestasis                                                                                | 1.65E+00 | 2.24E-02 | 8.00E-02 | ADCY9,IL1A,IL1R1,IL6,TLR4,LY96 (includes EG:17087),IL18 (includes EG:16173),NFKBIA,IL1RN,PRKCH,ADCY7,TNF,ESR1,PRKD1 |
